# Supplementary material for: Communication in the context of glioblastoma treatment: A qualitative study of what matters most to patients, caregivers and health care professionals
Source: PubMed Central journal article supplement (PMC10227096; doi:10.1177/02692163231152525), 2023-02-03
Supplement: sj-pdf-1-pmj-10.1177_02692163231152525.pdf [file sj-pdf-1-pmj-10.1177_02692163231152525.pdf]

## Supporting Information 1

**Table 1.** Summary interview topic guide, with questions tailored to each stakeholder group (patients, caregivers, healthcare professionals).

| Topics                                  | Key questions                                                                                                            |
|-----------------------------------------|--------------------------------------------------------------------------------------------------------------------------|
| <b>1. Communication about treatment</b> | What were your experiences of communication around treatment options? (patients, caregivers)                             |
|                                         | <i>How do you typically communicate with patients and caregivers about treatment options? (Healthcare professionals)</i> |
|                                         | Which treatment benefits and risks matter most to you? (patients, caregivers)                                            |
|                                         | <i>How do you discuss treatment benefits and risks? (Healthcare professionals)</i>                                       |
| <b>2. Experience of treatment</b>       | What has been your experience with treatment decision-making? (patients, caregiver)                                      |
|                                         | <i>How are treatment decisions made? (Healthcare professionals)</i>                                                      |
|                                         | What was your experience of treatment received? (patients, caregivers)                                                   |
|                                         | <i>How do patients typically experience treatment? (Healthcare professionals)</i>                                        |
| <b>3. Impact of Covid-19</b>            | What do you feel was most important to you at that time? (patients, caregivers)                                          |
|                                         | <i>What do you think is most important to patients and caregivers? (Healthcare professionals)</i>                        |
|                                         | Has Covid-19 affected communication with your treatment team? If so, how? (patients, caregivers)                         |
|                                         | <i>Has Covid-19 affected communication with patients and caregivers? If so, how? (Healthcare professionals)</i>          |
